# Supplementary material for: Association of Health Care Use and Economic Outcomes After Injury in Cameroon
Source: PubMed Central journal article supplement (PMC7237963; doi:10.1001/jamanetworkopen.2020.5171), 2020-05-19

## Supplementary Online Content

Christie SA, Dickson D, Mbeboh SN, et al. Association of health care use and economic outcomes after injury in Cameroon. *JAMA Netw Open*. 2020;3(5):e 205171. doi:10.1001/jamanetworkopen.2020.5171

### **eAppendix.** Community-Based Household Survey

**eTable 1.** Household Demographic Comparison Between Community-Based Survey (2017) and Demographic and Health Survey (2011) Data for Southwest Region of Cameroon

**eTable 2.** Factors Associated With Care-Seeking Decisions and Severe Financial Hardship After Injury

**eTable 3.** Demographics, Injury Characteristics and Use of Care in Interviewed Households

**eFigure.** Distribution of Disability Type and Severity After Injury in Southwest Region of Cameroon (n= 503)

This supplementary material has been provided by the authors to give readers additional information about their work.

eAppendix. Community-Based Household Survey

|                          |                                                                                    |                                                                                                                                                    |                                                                                                                                          |                  |              |
|--------------------------|------------------------------------------------------------------------------------|----------------------------------------------------------------------------------------------------------------------------------------------------|------------------------------------------------------------------------------------------------------------------------------------------|------------------|--------------|
| <b>STUDY INFORMATION</b> | Health District:                                                                   | Health Area:                                                                                                                                       | Interviewer Code:                                                                                                                        | Household Order: | Household #: |
| <b>CONSENT STATUS</b>    | <input type="checkbox"/> Yes<br>Family Representative: _____<br>Family Name: _____ | <input type="checkbox"/> No<br><i>If consent status switched during the survey was permission given to use previously collected data? Yes / No</i> | <input type="checkbox"/> Not Eligible<br><i>(Nobody &gt;= age 18, not at home after multiple attempts, or cannot understand consent)</i> |                  |              |

**SECTION 1.1 Socioeconomics**

|          |                                                                                                                                                                                                                                                                                                                                                         |
|----------|---------------------------------------------------------------------------------------------------------------------------------------------------------------------------------------------------------------------------------------------------------------------------------------------------------------------------------------------------------|
| 1.1.1    | Is the household... <input type="checkbox"/> Rural/ More like a village? <input type="checkbox"/> Urban/More like a city?                                                                                                                                                                                                                               |
| 1.1.2    | Does <u>any</u> member of the household own a cellphone? <input type="checkbox"/> Yes <input type="checkbox"/> No                                                                                                                                                                                                                                       |
| 1.1.3    | Does the household... <input type="checkbox"/> Own the home? <input type="checkbox"/> Rent the home? <input type="checkbox"/> Live for free?                                                                                                                                                                                                            |
| 1.1.4    | Does the household <u>own</u> agricultural land? <input type="checkbox"/> Yes <input type="checkbox"/> No                                                                                                                                                                                                                                               |
| 1.1.5    | What types of cooking fuel are used in the household? ( <i>select all that apply</i> ) <input type="checkbox"/> Wood <input type="checkbox"/> Charcoal <input type="checkbox"/> Liquid Petroleum Gas (LPG) <input type="checkbox"/> Kerosene <input type="checkbox"/> Other                                                                             |
| 1.1.6a-b | a. What is the highest education level achieved by <u>any</u> member of the household? <input type="checkbox"/> No formal education <input type="checkbox"/> Primary School <input type="checkbox"/> Secondary/High School <input type="checkbox"/> Tertiary/College <input type="checkbox"/> Unknown <input type="checkbox"/> Other: _____<br>b. _____ |

**SECTION 1.2 Household Members and Injury** (*\*Household= all persons who normally sleep under the same roof and share the same kitchen and including any such person who died in the last year*)

Starting with yourself, list the age and gender of each person living in your household\* If anybody in the household died in the last year what was their age and gender?

| Subject #      | a. Age<br>(years) | b. Sex<br>(M/F) | c. If deceased,<br>date of death?<br>*<br>( DD/MM/YYYY) | d. Were any of these people injured in the past year in a way that <u>limited normal activities for at least one day</u> or which <u>needed treatment</u> ? ** | e. On <u>how many separate occasions</u> was each person injured in the past year?<br><br>(# separate occasions) | f. Does anybody in the household <u>CURRENTLY</u> have any of the following problems?<br><br><i>(write all applicable codes on the right for each person, IF THE PROBLEM IS DUE TO INJURY WITHIN 1 YEAR, STAR)</i>                                                                                                                                    |
|----------------|-------------------|-----------------|---------------------------------------------------------|----------------------------------------------------------------------------------------------------------------------------------------------------------------|------------------------------------------------------------------------------------------------------------------|-------------------------------------------------------------------------------------------------------------------------------------------------------------------------------------------------------------------------------------------------------------------------------------------------------------------------------------------------------|
| 1 (Respondent) |                   |                 |                                                         |                                                                                                                                                                |                                                                                                                  | 1. Breast changes like lumps, cancer, skin or nipple changes or discharge<br>2. Mass/swelling that changes size/sometimes disappears (HERNIA)<br>3. Other mass, lump or growth<br>4. Wound/Burn/scald<br>5. Deformity<br>6. Bleeding from rectum<br>7. New blindness or lost most of their vision<br>8. Abdominal distension OR severe/recurrent pain |
| 2              |                   |                 |                                                         |                                                                                                                                                                |                                                                                                                  |                                                                                                                                                                                                                                                                                                                                                       |
| 3              |                   |                 |                                                         |                                                                                                                                                                |                                                                                                                  |                                                                                                                                                                                                                                                                                                                                                       |
| 4              |                   |                 |                                                         |                                                                                                                                                                |                                                                                                                  |                                                                                                                                                                                                                                                                                                                                                       |
| 5              |                   |                 |                                                         |                                                                                                                                                                |                                                                                                                  |                                                                                                                                                                                                                                                                                                                                                       |
| 6              |                   |                 |                                                         |                                                                                                                                                                |                                                                                                                  |                                                                                                                                                                                                                                                                                                                                                       |
| 7              |                   |                 |                                                         |                                                                                                                                                                |                                                                                                                  |                                                                                                                                                                                                                                                                                                                                                       |
| 8              |                   |                 |                                                         |                                                                                                                                                                |                                                                                                                  |                                                                                                                                                                                                                                                                                                                                                       |
| 9              |                   |                 |                                                         |                                                                                                                                                                |                                                                                                                  |                                                                                                                                                                                                                                                                                                                                                       |
| 10             |                   |                 |                                                         |                                                                                                                                                                |                                                                                                                  |                                                                                                                                                                                                                                                                                                                                                       |
| 11             |                   |                 |                                                         |                                                                                                                                                                |                                                                                                                  |                                                                                                                                                                                                                                                                                                                                                       |
| 12             |                   |                 |                                                         |                                                                                                                                                                |                                                                                                                  |                                                                                                                                                                                                                                                                                                                                                       |
| 13             |                   |                 |                                                         |                                                                                                                                                                |                                                                                                                  |                                                                                                                                                                                                                                                                                                                                                       |
| 14             |                   |                 |                                                         |                                                                                                                                                                |                                                                                                                  |                                                                                                                                                                                                                                                                                                                                                       |
| 15             |                   |                 |                                                         |                                                                                                                                                                |                                                                                                                  |                                                                                                                                                                                                                                                                                                                                                       |
| 16             |                   |                 |                                                         |                                                                                                                                                                |                                                                                                                  |                                                                                                                                                                                                                                                                                                                                                       |
| 17             |                   |                 |                                                         |                                                                                                                                                                |                                                                                                                  |                                                                                                                                                                                                                                                                                                                                                       |
| 18             |                   |                 |                                                         |                                                                                                                                                                |                                                                                                                  |                                                                                                                                                                                                                                                                                                                                                       |

|                                                                                                                                                                 |                                                           |  |  |  |                          |                          |                                                                                                                          |
|-----------------------------------------------------------------------------------------------------------------------------------------------------------------|-----------------------------------------------------------|--|--|--|--------------------------|--------------------------|--------------------------------------------------------------------------------------------------------------------------|
| 19                                                                                                                                                              |                                                           |  |  |  |                          |                          | 9. Bleeding/sickness within 6 weeks of giving birth                                                                      |
| 20                                                                                                                                                              |                                                           |  |  |  |                          |                          | 10. Can't pass stool/urine or eat                                                                                        |
| Study #s:                                                                                                                                                       | <i>*If deceased, fill out Section 1.3, Cause of Death</i> |  |  |  | TOTAL _____ Occasions ** | TOTAL PROBLEMS _____ *** | <b>***Fill out one Section 3 form for each separate problem- EXCLUDING those due to injury &lt; 1 year ago (STARRED)</b> |
| <b>**For each separate occasion for each injured person, fill out one Section 2 form. The TOTAL Occasions should equal the number of Section 2 forms needed</b> |                                                           |  |  |  |                          |                          |                                                                                                                          |

| Section 1.3 CAUSE OF DEATH                                                                                                                                |                                                                                                                                                                                                                                                                                                                                                                                                                                                                                                                                                                                                                    |                                                                                              |                                                       |                                                                                                                                                                                                                                                                                                                                                                 |
|-----------------------------------------------------------------------------------------------------------------------------------------------------------|--------------------------------------------------------------------------------------------------------------------------------------------------------------------------------------------------------------------------------------------------------------------------------------------------------------------------------------------------------------------------------------------------------------------------------------------------------------------------------------------------------------------------------------------------------------------------------------------------------------------|----------------------------------------------------------------------------------------------|-------------------------------------------------------|-----------------------------------------------------------------------------------------------------------------------------------------------------------------------------------------------------------------------------------------------------------------------------------------------------------------------------------------------------------------|
| How many household members died in the past 1 year? _____                                                                                                 |                                                                                                                                                                                                                                                                                                                                                                                                                                                                                                                                                                                                                    |                                                                                              |                                                       |                                                                                                                                                                                                                                                                                                                                                                 |
| 1.3.1a-d                                                                                                                                                  |                                                                                                                                                                                                                                                                                                                                                                                                                                                                                                                                                                                                                    | WRITE THE SUBJECT # OF EACH DECEASED FAMILY MEMBER IN THE GREY LEFT COLUMN AND FILL 3.2.1A-D |                                                       |                                                                                                                                                                                                                                                                                                                                                                 |
| If death was due to an injury for which you will fill out a Section 2 select first option for 1.3.1a. You do not need to answer 3.2.1b-d for this person. |                                                                                                                                                                                                                                                                                                                                                                                                                                                                                                                                                                                                                    |                                                                                              |                                                       |                                                                                                                                                                                                                                                                                                                                                                 |
| Write the Subject # of all household members who DIED in the past year                                                                                    | a. Did any of the following problems occur the WEEK before death or CAUSE the death? (select all that apply)                                                                                                                                                                                                                                                                                                                                                                                                                                                                                                       | b. If <u>any</u> care was sought for this problem, where? (Circle all that apply)            | c. Did they have an <u>operation</u> for the problem? | d. If not, what was the reason for NOT SEEING A DOCTOR or for NOT HAVING AN OPERATION?                                                                                                                                                                                                                                                                          |
| _____                                                                                                                                                     | <input type="checkbox"/> Wound/Injury in the past 1 year<br><input type="checkbox"/> Wound (other)<br><input type="checkbox"/> Mass, growth or swelling<br><input type="checkbox"/> Deformity (they were born with)<br><input type="checkbox"/> Deformity (they developed)<br><input type="checkbox"/> Abdominal distention or pain<br><input type="checkbox"/> Unable to pass stool/urine, or vomits all food<br><input type="checkbox"/> Bleeding/sickness within 6 weeks of childbirth<br><input type="checkbox"/> Abnormal appearing newborn<br><input type="checkbox"/> None <input type="checkbox"/> Unknown | <b>formal / traditional / home / other / none / NA</b>                                       | <b>yes / no / unknown</b>                             | <input type="checkbox"/> No need<br><input type="checkbox"/> No money<br><input type="checkbox"/> No transportation/ Too far<br><input type="checkbox"/> Facility, Personnel or Equipment not available<br><input type="checkbox"/> No time<br><input type="checkbox"/> Preference<br><input type="checkbox"/> Unknown<br><input type="checkbox"/> Other: _____ |
| _____                                                                                                                                                     | <input type="checkbox"/> Wound/Injury in the past 1 year<br><input type="checkbox"/> Wound (other)<br><input type="checkbox"/> Mass, growth or swelling<br><input type="checkbox"/> Deformity (they were born with)<br><input type="checkbox"/> Deformity (they developed)<br><input type="checkbox"/> Abdominal distention or pain<br><input type="checkbox"/> Unable to pass stool/urine, or vomits all food<br><input type="checkbox"/> Bleeding/sickness within 6 weeks of childbirth<br><input type="checkbox"/> Abnormal appearing newborn<br><input type="checkbox"/> None <input type="checkbox"/> Unknown | <b>formal / traditional / home / other / none / NA</b>                                       | <b>yes / no / unknown</b>                             | <input type="checkbox"/> No need<br><input type="checkbox"/> No money<br><input type="checkbox"/> No transportation/ Too far<br><input type="checkbox"/> Facility, Personnel or Equipment not available<br><input type="checkbox"/> No time<br><input type="checkbox"/> Preference<br><input type="checkbox"/> Unknown<br><input type="checkbox"/> Other: _____ |
| _____                                                                                                                                                     | <input type="checkbox"/> Wound/Injury in the past 1 year<br><input type="checkbox"/> Wound (other)<br><input type="checkbox"/> Mass, growth or swelling<br><input type="checkbox"/> Deformity (they were born with)<br><input type="checkbox"/> Deformity (they developed)<br><input type="checkbox"/> Abdominal distention or pain<br><input type="checkbox"/> Unable to pass stool/urine, or vomits all food<br><input type="checkbox"/> Bleeding/sickness within 6 weeks of childbirth<br><input type="checkbox"/> Abnormal appearing newborn<br><input type="checkbox"/> None <input type="checkbox"/> Unknown | <b>formal / traditional / home / other / none / NA</b>                                       | <b>yes / no / unknown</b>                             | <input type="checkbox"/> No need<br><input type="checkbox"/> No money<br><input type="checkbox"/> No transportation/ Too far<br><input type="checkbox"/> Facility, Personnel or Equipment not available<br><input type="checkbox"/> No time<br><input type="checkbox"/> Preference<br><input type="checkbox"/> Unknown<br><input type="checkbox"/> Other: _____ |
| _____                                                                                                                                                     | <input type="checkbox"/> Wound/Injury in the past 1 year<br><input type="checkbox"/> Wound (other)<br><input type="checkbox"/> Mass, growth or swelling<br><input type="checkbox"/> Deformity (they were born with)<br><input type="checkbox"/> Deformity (they developed)<br><input type="checkbox"/> Abdominal distention or pain<br><input type="checkbox"/> Unable to pass stool/urine, or vomits all food<br><input type="checkbox"/> Bleeding/sickness within 6 weeks of childbirth<br><input type="checkbox"/> Abnormal appearing newborn<br><input type="checkbox"/> None <input type="checkbox"/> Unknown | <b>formal / traditional / home / other / none / NA</b>                                       | <b>yes / no / unknown</b>                             | <input type="checkbox"/> No need<br><input type="checkbox"/> No money<br><input type="checkbox"/> No transportation/ Too far<br><input type="checkbox"/> Facility, Personnel or Equipment not available<br><input type="checkbox"/> No time<br><input type="checkbox"/> Preference<br><input type="checkbox"/> Unknown<br><input type="checkbox"/> Other: _____ |

|  |                                                                                                                                                                                                                                                                                                                                                                                                                                                                                                                                                                                                                                                                                      |                                                        |                           |                                                                                                                                                                                                                                                                                                                                                                                                                        |
|--|--------------------------------------------------------------------------------------------------------------------------------------------------------------------------------------------------------------------------------------------------------------------------------------------------------------------------------------------------------------------------------------------------------------------------------------------------------------------------------------------------------------------------------------------------------------------------------------------------------------------------------------------------------------------------------------|--------------------------------------------------------|---------------------------|------------------------------------------------------------------------------------------------------------------------------------------------------------------------------------------------------------------------------------------------------------------------------------------------------------------------------------------------------------------------------------------------------------------------|
|  | <input type="checkbox"/> None <input type="checkbox"/> Unknown<br><input type="checkbox"/> Wound/Injury in the past 1 year<br><input type="checkbox"/> Wound (other)<br><input type="checkbox"/> Mass, growth or swelling<br><input type="checkbox"/> Deformity (they were born with)<br><input type="checkbox"/> Deformity (they developed)<br><input type="checkbox"/> Abdominal distention or pain<br><input type="checkbox"/> Unable to pass stool/urine, or vomits all food<br><input type="checkbox"/> Bleeding/sickness within 6 weeks of childbirth<br><input type="checkbox"/> Abnormal appearing newborn<br><input type="checkbox"/> None <input type="checkbox"/> Unknown | <i>formal / traditional / home / other / none / NA</i> | <i>yes / no / unknown</i> | <input type="checkbox"/> <b>Other:</b> _____<br><input type="checkbox"/> No need<br><input type="checkbox"/> No money<br><input type="checkbox"/> No transportation/ Too far<br><input type="checkbox"/> Facility, Personnel or Equipment not available<br><input type="checkbox"/> No time<br><input type="checkbox"/> Preference<br><input type="checkbox"/> Unknown<br><input type="checkbox"/> <b>Other:</b> _____ |
|--|--------------------------------------------------------------------------------------------------------------------------------------------------------------------------------------------------------------------------------------------------------------------------------------------------------------------------------------------------------------------------------------------------------------------------------------------------------------------------------------------------------------------------------------------------------------------------------------------------------------------------------------------------------------------------------------|--------------------------------------------------------|---------------------------|------------------------------------------------------------------------------------------------------------------------------------------------------------------------------------------------------------------------------------------------------------------------------------------------------------------------------------------------------------------------------------------------------------------------|

| SECTION 2: INJURY OCCASION                                               |                                                                                                                                                                                                                                                                                                                                                                                                                                                                                                                                                                                                                                                                                                                                                                      |
|--------------------------------------------------------------------------|----------------------------------------------------------------------------------------------------------------------------------------------------------------------------------------------------------------------------------------------------------------------------------------------------------------------------------------------------------------------------------------------------------------------------------------------------------------------------------------------------------------------------------------------------------------------------------------------------------------------------------------------------------------------------------------------------------------------------------------------------------------------|
| <b>2.1 Subject #</b> _____                                               | <b>Separate Occasion #</b> _____ (1 <sup>st</sup> occasion=1, 2 <sup>nd</sup> occasion=2, etc.) <b>(NAME</b> _____ <b>)</b>                                                                                                                                                                                                                                                                                                                                                                                                                                                                                                                                                                                                                                          |
| <b>2.1.1</b>                                                             | <b>Date of Injury</b> (approximate date if cannot remember) _____ DD/MM/YYYY                                                                                                                                                                                                                                                                                                                                                                                                                                                                                                                                                                                                                                                                                         |
| <b>2.2 Pre-Injury Activities</b>                                         |                                                                                                                                                                                                                                                                                                                                                                                                                                                                                                                                                                                                                                                                                                                                                                      |
| <b>2.2.1</b>                                                             | <b>How many years of school has the injured person completed?</b> _____ years                                                                                                                                                                                                                                                                                                                                                                                                                                                                                                                                                                                                                                                                                        |
| <b>2.2.2a-c</b>                                                          | <b>a. In the 30 days prior to injury what job or activity did the injured person spend <u>most</u> of their time doing?</b><br>_____                                                                                                                                                                                                                                                                                                                                                                                                                                                                                                                                                                                                                                 |
|                                                                          | <i>When entering data, select occupation and industry based on this description and using the ECONOMIC CODE SHEET.</i><br>i. OCCUPATION # _____ ii. INDUSTRY # _____ Coder _____                                                                                                                                                                                                                                                                                                                                                                                                                                                                                                                                                                                     |
|                                                                          | <b>b. How many hours per week did they do this activity?</b> _____ hours/week                                                                                                                                                                                                                                                                                                                                                                                                                                                                                                                                                                                                                                                                                        |
|                                                                          | <b>c. About <u>how much</u> did they earn doing this activity?</b> _____ CFA per (circle one) day / week / month / year                                                                                                                                                                                                                                                                                                                                                                                                                                                                                                                                                                                                                                              |
| <b>2.2.3</b>                                                             | <b>Did the person have another major job or activity?</b><br><input type="checkbox"/> Yes <input type="checkbox"/> No <input type="checkbox"/> Unknown                                                                                                                                                                                                                                                                                                                                                                                                                                                                                                                                                                                                               |
| <i>If "NO" or "UNKNOWN" skip to Section 2.3</i>                          |                                                                                                                                                                                                                                                                                                                                                                                                                                                                                                                                                                                                                                                                                                                                                                      |
| <b>2.2.4a-c</b>                                                          | <b>a. If yes, describe:</b><br>_____                                                                                                                                                                                                                                                                                                                                                                                                                                                                                                                                                                                                                                                                                                                                 |
|                                                                          | <i>When entering data, select occupation and industry based on this description and using the ECONOMIC CODE SHEET.</i><br>i. OCCUPATION # _____ ii. INDUSTRY # _____ Coder _____                                                                                                                                                                                                                                                                                                                                                                                                                                                                                                                                                                                     |
|                                                                          | <b>b. How many hours per week did they do this activity?</b> _____ hours/week                                                                                                                                                                                                                                                                                                                                                                                                                                                                                                                                                                                                                                                                                        |
|                                                                          | <b>c. About <u>how much</u> did the person earn doing this activity?</b> _____ CFA per (circle one) day / week / month / year                                                                                                                                                                                                                                                                                                                                                                                                                                                                                                                                                                                                                                        |
| <b>2.3 Injury Characteristics</b>                                        |                                                                                                                                                                                                                                                                                                                                                                                                                                                                                                                                                                                                                                                                                                                                                                      |
| <b>2.3.1a-b</b>                                                          | <b>a. What was the person doing when they became injured?</b><br><input type="checkbox"/> Work <input type="checkbox"/> School <input type="checkbox"/> Travel/Transit <input type="checkbox"/> Sport <input type="checkbox"/> Leisure/Play <input type="checkbox"/> Unknown <input type="checkbox"/> <b>Other:</b> b. _____                                                                                                                                                                                                                                                                                                                                                                                                                                         |
| <b>2.3.2a-b</b>                                                          | <b>a. Where did the injury occur?</b><br><input type="checkbox"/> At home <input type="checkbox"/> Railway line <input type="checkbox"/> Farm <input type="checkbox"/> Sports area <input type="checkbox"/> Unknown<br><input type="checkbox"/> Someone else's home <input type="checkbox"/> Construction site <input type="checkbox"/> Body of water <input type="checkbox"/> School <input type="checkbox"/> <b>Other:</b><br><input type="checkbox"/> Street/highway <input type="checkbox"/> Trade/Service area <input type="checkbox"/> Open land <input type="checkbox"/> Public area <input type="checkbox"/> <b>b.</b> _____                                                                                                                                 |
| <b>2.3.3a-b</b>                                                          | <b>a. What caused the injury?</b><br><input type="checkbox"/> <b>Road Traffic Injury</b> <input type="checkbox"/> Firearm wound <input type="checkbox"/> Burn from flame/heat <input type="checkbox"/> Poisoning <input type="checkbox"/> Unknown<br><input type="checkbox"/> Fall <input type="checkbox"/> Other sharp injury <input type="checkbox"/> Scald from hot liquid <input type="checkbox"/> Drowning <input type="checkbox"/> <b>Other:</b><br><input type="checkbox"/> Blunt force (object/person) <input type="checkbox"/> Electrocutation <input type="checkbox"/> Smoke inhalation <input type="checkbox"/> Animal bite <input type="checkbox"/> <b>b.</b> _____<br><input type="checkbox"/> Blade/knife cut <input type="checkbox"/> Explosive blast |
| <i>If "Road Traffic Injury" was NOT selected, skip to Question 2.3.5</i> |                                                                                                                                                                                                                                                                                                                                                                                                                                                                                                                                                                                                                                                                                                                                                                      |
| <b>2.3.4a-d</b>                                                          | <b>a. If <u>Road Traffic Injury</u>, what type(s) of transportation were involved?</b><br>(select all that apply)<br><input type="checkbox"/> Pedestrian <input type="checkbox"/> Taxi <input type="checkbox"/> Truck/Lorrie <input type="checkbox"/> Bicycle<br><input type="checkbox"/> Private car <input type="checkbox"/> Mototaxi <input type="checkbox"/> Bus <input type="checkbox"/> Unknown<br><input type="checkbox"/> Private motorcycle <input type="checkbox"/> Minivan/minibus <input type="checkbox"/> Train <input type="checkbox"/> <b>Other</b><br>b. _____                                                                                                                                                                                       |
|                                                                          | <b>c. If RTI, were seatbelts used?</b><br><input type="checkbox"/> Yes <input type="checkbox"/> No <input type="checkbox"/> NA<br><b>d. If RTI, were helmets worn?</b><br><input type="checkbox"/> Yes <input type="checkbox"/> No <input type="checkbox"/> NA                                                                                                                                                                                                                                                                                                                                                                                                                                                                                                       |
| <b>2.3.5</b>                                                             | <b>Was the injury accidental or did somebody do this on purpose?</b><br><input type="checkbox"/> It was an accident (unintentional) <input type="checkbox"/> Someone else did it to them on purpose <input type="checkbox"/> They did it to themselves on purpose <input type="checkbox"/> Unknown/Unsure                                                                                                                                                                                                                                                                                                                                                                                                                                                            |
| <b>2.3.6</b>                                                             | <b>Point to and tell me which part(s) of the body were injured...</b> (select all that apply)<br><input type="checkbox"/> Head <input type="checkbox"/> Back at/above 12 <sup>th</sup> rib <input type="checkbox"/> Abdomen <input type="checkbox"/> Upper extremities<br><input type="checkbox"/> Face <input type="checkbox"/> Back below 12 <sup>th</sup> rib <input type="checkbox"/> Pelvis <input type="checkbox"/> Lower extremities<br><input type="checkbox"/> Neck <input type="checkbox"/> Chest and torso <input type="checkbox"/> Genitals <input type="checkbox"/> Unknown                                                                                                                                                                             |
| <b>2.3.7a-b</b>                                                          | <b>a. How was the person hurt?</b> (Select all that apply)<br><input type="checkbox"/> Broken bone <input type="checkbox"/> Cut/bite/wound <input type="checkbox"/> Concussion/Brain injury <input type="checkbox"/> Unknown/unsure<br><input type="checkbox"/> Sprain/strain <input type="checkbox"/> Bruise or scrape <input type="checkbox"/> Internal organ injury <input type="checkbox"/> <b>Other:</b><br><input type="checkbox"/> Dislocation <input type="checkbox"/> Burn <input type="checkbox"/> Pain (not otherwise specified) <input type="checkbox"/> <b>b.</b> _____                                                                                                                                                                                 |
| <b>2.3.8</b>                                                             | <b>On the day of the injury, did the injured person?</b> (Select all that apply) <input type="checkbox"/> None<br><input type="checkbox"/> Die <input type="checkbox"/> Stop breathing <input type="checkbox"/> Lose Consciousness <input type="checkbox"/> Forget the injury <input type="checkbox"/> Act confused <input type="checkbox"/> Unknown                                                                                                                                                                                                                                                                                                                                                                                                                 |



|                                                                                                                          |                                                                                                                                                                                                                                                                                                                                                                                                                                                                                                       |                                                                                                                                                                                  |
|--------------------------------------------------------------------------------------------------------------------------|-------------------------------------------------------------------------------------------------------------------------------------------------------------------------------------------------------------------------------------------------------------------------------------------------------------------------------------------------------------------------------------------------------------------------------------------------------------------------------------------------------|----------------------------------------------------------------------------------------------------------------------------------------------------------------------------------|
| <b>2.6.2</b>                                                                                                             | Did the injured person lose their job or completely stop going to school because they had been injured?                                                                                                                                                                                                                                                                                                                                                                                               |                                                                                                                                                                                  |
|                                                                                                                          | <input type="checkbox"/> Yes <input type="checkbox"/> No <input type="checkbox"/> Unknown <input type="checkbox"/> NA                                                                                                                                                                                                                                                                                                                                                                                 |                                                                                                                                                                                  |
| <b>2.6.3a-d</b>                                                                                                          | <b>a. Has the patient been readmitted to the hospital or needed additional treatment for problems related to their injury?</b><br><small>(NOT including scheduled follow-up visits)</small><br><input type="checkbox"/> Yes <input type="checkbox"/> No <input type="checkbox"/> Unknown                                                                                                                                                                                                              |                                                                                                                                                                                  |
|                                                                                                                          | <b>b. How many..</b><br>_____ re-admissions?<br>_____ consultations/ visits?<br>_____ operations?                                                                                                                                                                                                                                                                                                                                                                                                     |                                                                                                                                                                                  |
| <b>2.6.4</b>                                                                                                             | Will the injured person likely need further medical care in the future for problems related to their injury?                                                                                                                                                                                                                                                                                                                                                                                          |                                                                                                                                                                                  |
|                                                                                                                          | <input type="checkbox"/> Yes <input type="checkbox"/> No <input type="checkbox"/> Unknown                                                                                                                                                                                                                                                                                                                                                                                                             |                                                                                                                                                                                  |
| <b>2.7 Economic Impact</b>                                                                                               |                                                                                                                                                                                                                                                                                                                                                                                                                                                                                                       |                                                                                                                                                                                  |
| <b>2.7.1</b>                                                                                                             | After being hurt, was there at least one day the injured person was not able to perform their <u>main job/ activity</u> by themselves?                                                                                                                                                                                                                                                                                                                                                                |                                                                                                                                                                                  |
|                                                                                                                          | <input type="checkbox"/> Yes <input type="checkbox"/> No <input type="checkbox"/> Unknown                                                                                                                                                                                                                                                                                                                                                                                                             |                                                                                                                                                                                  |
| <i>If "NO" or "UNKNOWN" skip to <b>Question 2.7.3</b></i>                                                                |                                                                                                                                                                                                                                                                                                                                                                                                                                                                                                       |                                                                                                                                                                                  |
| <b>2.7.2 a-c</b>                                                                                                         | <b>a. If yes, for how many days?</b> _____ days<br><b>b. How much of the job/activity was completed by others?</b> <input type="checkbox"/> All of it <input type="checkbox"/> Most of it <input type="checkbox"/> Some of it <input type="checkbox"/> Unknown/NA<br><b>c. Who performed or helped them perform the job/activity?</b> <input type="checkbox"/> Family <input type="checkbox"/> Non-family <input type="checkbox"/> Nobody <input type="checkbox"/> Unknown/NA                         |                                                                                                                                                                                  |
| <i>If the injured person DID NOT have a second major job or activity (Question 2.2.3), skip to <b>Question 2.7.5</b></i> |                                                                                                                                                                                                                                                                                                                                                                                                                                                                                                       |                                                                                                                                                                                  |
| <b>2.7.3</b>                                                                                                             | After being hurt, was there at least one day the injured person could not perform their <u>secondary job/activity</u> by themselves?                                                                                                                                                                                                                                                                                                                                                                  |                                                                                                                                                                                  |
|                                                                                                                          | <input type="checkbox"/> Yes <input type="checkbox"/> No <input type="checkbox"/> Unknown                                                                                                                                                                                                                                                                                                                                                                                                             |                                                                                                                                                                                  |
| <i>If "NO" or "UNKNOWN" skip to <b>Question 2.7.5</b></i>                                                                |                                                                                                                                                                                                                                                                                                                                                                                                                                                                                                       |                                                                                                                                                                                  |
| <b>2.7.4a-c</b>                                                                                                          | <b>a. If yes, for how many days?</b> _____ days<br><b>b. How much of the job/activity was completed by others?</b> <input type="checkbox"/> All of it <input type="checkbox"/> Most of it <input type="checkbox"/> Some of it <input type="checkbox"/> Unknown/NA<br><b>c. Who performed or helped them perform the job/activity?</b> <input type="checkbox"/> Family <input type="checkbox"/> Non-family <input type="checkbox"/> Nobody <input type="checkbox"/> Unknown/NA                         |                                                                                                                                                                                  |
| <b>2.7.5a-b</b>                                                                                                          | <b>a. After being hurt, was there even one day another family member had to shift their usual activities to care for the injured person (CARETAKER)?</b><br><input type="checkbox"/> Yes <input type="checkbox"/> No <input type="checkbox"/> Unknown<br><b>b. If yes, for how many days?</b> _____ days                                                                                                                                                                                              |                                                                                                                                                                                  |
| <i>If "NO" or "UNKNOWN" skip to <b>Question 2.7.9</b></i>                                                                |                                                                                                                                                                                                                                                                                                                                                                                                                                                                                                       |                                                                                                                                                                                  |
| <b>2.7.6a-c</b>                                                                                                          | <b>a. In the 30 days prior to the person's injury what job/activity did the CARETAKERS spend most of their time doing _____?</b><br><b>b. How many hours per week did they do this activity?</b> _____ hours/week<br><b>c. About how much did the person earn doing this activity?</b> _____ CFA per (circle one) day / week / month / year                                                                                                                                                           | <i>When entering data, select occupation and industry based on this description and using the ECONOMIC CODE SHEET.</i><br>i. OCCUPATION # _____ ii. INDUSTRY # _____ Coder _____ |
| <b>2.7.7</b>                                                                                                             | In the 30 days prior to the injury, did the CARETAKER have another major job/activity?                                                                                                                                                                                                                                                                                                                                                                                                                |                                                                                                                                                                                  |
|                                                                                                                          | <input type="checkbox"/> Yes <input type="checkbox"/> No <input type="checkbox"/> Unknown                                                                                                                                                                                                                                                                                                                                                                                                             |                                                                                                                                                                                  |
| <i>If "NO" or "UNKNOWN" skip to <b>Question 2.7.9</b></i>                                                                |                                                                                                                                                                                                                                                                                                                                                                                                                                                                                                       |                                                                                                                                                                                  |
| <b>2.7.8a-c</b>                                                                                                          | <b>a. If yes, describe:</b> _____<br>_____                                                                                                                                                                                                                                                                                                                                                                                                                                                            | <i>When entering data, select occupation and industry based on this description and using the ECONOMIC CODE SHEET.</i><br>i. OCCUPATION # _____ ii. INDUSTRY # _____ Coder _____ |
|                                                                                                                          | <b>b. How many hours per week did they do this activity?</b> _____ hours/week<br><b>c. About how much did the person earn doing this activity?</b> _____ CFA per (circle one) day / week / month / year                                                                                                                                                                                                                                                                                               |                                                                                                                                                                                  |
| <b>2.7.9</b>                                                                                                             | Following the injury, did it become more difficult for the family to afford expenses such as food and rent?                                                                                                                                                                                                                                                                                                                                                                                           |                                                                                                                                                                                  |
|                                                                                                                          | <input type="checkbox"/> Yes <input type="checkbox"/> No <input type="checkbox"/> Unknown                                                                                                                                                                                                                                                                                                                                                                                                             |                                                                                                                                                                                  |
| <b>2.7.10a-d</b>                                                                                                         | <b>a. Following the injury did the family do any of the following? (select all which apply)</b><br><input type="checkbox"/> Sell assets (livestock, vehicles, property etc.) <b>b. If so, how much was made from the sale?</b> _____ CFA<br><input type="checkbox"/> Spend saved money <b>c. If so, how much was spent?</b> _____ CFA<br><input type="checkbox"/> Borrow money <b>d. If so, how much was borrowed?</b> _____ CFA<br><input type="checkbox"/> None<br><input type="checkbox"/> Unknown |                                                                                                                                                                                  |
| <b>2.7.11</b>                                                                                                            | How long do you expect the injured person's new limitations to last?                                                                                                                                                                                                                                                                                                                                                                                                                                  |                                                                                                                                                                                  |
|                                                                                                                          | <input type="checkbox"/> They recovered <input type="checkbox"/> _____ (circle one) day / week / month / year <input type="checkbox"/> Forever <input type="checkbox"/> Unknown                                                                                                                                                                                                                                                                                                                       |                                                                                                                                                                                  |

| Section 4: Opinions of Formal Care and Health Knowledge Assessment                                                                                                                                                                                                                        |                                                                                                                                                                                                                                                                                                                                                                                                                                                                                                                                                                                                                                                                                        |                                                                                                                                                                                                                                                                                           |                                                                                                                                                                                                                                                                       |                                                          |                                                       |                                                    |                               |                                                 |                                           |
|-------------------------------------------------------------------------------------------------------------------------------------------------------------------------------------------------------------------------------------------------------------------------------------------|----------------------------------------------------------------------------------------------------------------------------------------------------------------------------------------------------------------------------------------------------------------------------------------------------------------------------------------------------------------------------------------------------------------------------------------------------------------------------------------------------------------------------------------------------------------------------------------------------------------------------------------------------------------------------------------|-------------------------------------------------------------------------------------------------------------------------------------------------------------------------------------------------------------------------------------------------------------------------------------------|-----------------------------------------------------------------------------------------------------------------------------------------------------------------------------------------------------------------------------------------------------------------------|----------------------------------------------------------|-------------------------------------------------------|----------------------------------------------------|-------------------------------|-------------------------------------------------|-------------------------------------------|
| 4.1                                                                                                                                                                                                                                                                                       | Where would your family <u>most likely go</u> for medical care after injury? _____                                                                                                                                                                                                                                                                                                                                                                                                                                                                                                                                                                                                     |                                                                                                                                                                                                                                                                                           |                                                                                                                                                                                                                                                                       |                                                          |                                                       |                                                    |                               |                                                 |                                           |
| 4.2                                                                                                                                                                                                                                                                                       | <p>In your opinion, what is the biggest problem with formal medical care services in Southwest Cameroon?</p> <table border="0"> <tr> <td><input type="checkbox"/> Too expensive</td> <td><input type="checkbox"/> Traditional medicine is preferred</td> </tr> <tr> <td><input type="checkbox"/> Too far away/difficult to reach</td> <td><input type="checkbox"/> Faith treatment is preferred</td> </tr> <tr> <td><input type="checkbox"/> The treatments don't work</td> <td><input type="checkbox"/> None</td> </tr> <tr> <td><input type="checkbox"/> Rude behavior by staff</td> <td><input type="checkbox"/> Other: ii. _____</td> </tr> </table>                               | <input type="checkbox"/> Too expensive                                                                                                                                                                                                                                                    | <input type="checkbox"/> Traditional medicine is preferred                                                                                                                                                                                                            | <input type="checkbox"/> Too far away/difficult to reach | <input type="checkbox"/> Faith treatment is preferred | <input type="checkbox"/> The treatments don't work | <input type="checkbox"/> None | <input type="checkbox"/> Rude behavior by staff | <input type="checkbox"/> Other: ii. _____ |
| <input type="checkbox"/> Too expensive                                                                                                                                                                                                                                                    | <input type="checkbox"/> Traditional medicine is preferred                                                                                                                                                                                                                                                                                                                                                                                                                                                                                                                                                                                                                             |                                                                                                                                                                                                                                                                                           |                                                                                                                                                                                                                                                                       |                                                          |                                                       |                                                    |                               |                                                 |                                           |
| <input type="checkbox"/> Too far away/difficult to reach                                                                                                                                                                                                                                  | <input type="checkbox"/> Faith treatment is preferred                                                                                                                                                                                                                                                                                                                                                                                                                                                                                                                                                                                                                                  |                                                                                                                                                                                                                                                                                           |                                                                                                                                                                                                                                                                       |                                                          |                                                       |                                                    |                               |                                                 |                                           |
| <input type="checkbox"/> The treatments don't work                                                                                                                                                                                                                                        | <input type="checkbox"/> None                                                                                                                                                                                                                                                                                                                                                                                                                                                                                                                                                                                                                                                          |                                                                                                                                                                                                                                                                                           |                                                                                                                                                                                                                                                                       |                                                          |                                                       |                                                    |                               |                                                 |                                           |
| <input type="checkbox"/> Rude behavior by staff                                                                                                                                                                                                                                           | <input type="checkbox"/> Other: ii. _____                                                                                                                                                                                                                                                                                                                                                                                                                                                                                                                                                                                                                                              |                                                                                                                                                                                                                                                                                           |                                                                                                                                                                                                                                                                       |                                                          |                                                       |                                                    |                               |                                                 |                                           |
| 4.3 a-b                                                                                                                                                                                                                                                                                   | <p>a. Do you know how to get to the nearest health facility? <input type="checkbox"/> Yes <input type="checkbox"/> No</p> <p>b. If "Yes" what <u>type</u> of transportation would you most likely use to travel there? _____</p> <p>c. Using this method, approximately <u>how long</u> do you think it would take to travel there? _____ hours</p>                                                                                                                                                                                                                                                                                                                                    |                                                                                                                                                                                                                                                                                           |                                                                                                                                                                                                                                                                       |                                                          |                                                       |                                                    |                               |                                                 |                                           |
| 4.4                                                                                                                                                                                                                                                                                       | <p>Which of the following conditions do <u>you</u> believe can be treated or reversed with surgery? <input type="checkbox"/> None</p> <p>(select all that apply)</p> <p><input type="checkbox"/> Some types of blindness <input type="checkbox"/> Some types of cancer <input type="checkbox"/> Injury <input type="checkbox"/> Burns <input type="checkbox"/> Deformities</p>                                                                                                                                                                                                                                                                                                         |                                                                                                                                                                                                                                                                                           |                                                                                                                                                                                                                                                                       |                                                          |                                                       |                                                    |                               |                                                 |                                           |
| <i>If the respondent is MALE please skip to Section 5</i>                                                                                                                                                                                                                                 |                                                                                                                                                                                                                                                                                                                                                                                                                                                                                                                                                                                                                                                                                        |                                                                                                                                                                                                                                                                                           |                                                                                                                                                                                                                                                                       |                                                          |                                                       |                                                    |                               |                                                 |                                           |
| 4.5 a-c                                                                                                                                                                                                                                                                                   | <p>Do you know how to perform breast self-exam?</p> <p><input type="checkbox"/> No, I've never heard of it <input type="checkbox"/> No, I have heard of it but don't know how to do it <input type="checkbox"/> Yes, I know how to do it</p>                                                                                                                                                                                                                                                                                                                                                                                                                                           |                                                                                                                                                                                                                                                                                           |                                                                                                                                                                                                                                                                       |                                                          |                                                       |                                                    |                               |                                                 |                                           |
| <i>If "No..." was selected, skip to Section 5</i>                                                                                                                                                                                                                                         |                                                                                                                                                                                                                                                                                                                                                                                                                                                                                                                                                                                                                                                                                        |                                                                                                                                                                                                                                                                                           |                                                                                                                                                                                                                                                                       |                                                          |                                                       |                                                    |                               |                                                 |                                           |
|                                                                                                                                                                                                                                                                                           | <table border="0"> <tr> <td style="vertical-align: top;"> <p>b. How often have you done breast self-exam in the past year?</p> <p><input type="checkbox"/> Monthly</p> <p><input type="checkbox"/> Several times</p> <p><input type="checkbox"/> Once</p> <p><input type="checkbox"/> None</p> <p><input type="checkbox"/> I have NEVER done it</p> </td> <td style="vertical-align: top;"> <p>c. What time of the month do you perform self-breast exam?</p> <p><input type="checkbox"/> At any time</p> <p><input type="checkbox"/> First week after menses</p> <p><input type="checkbox"/> Second week after menses</p> <p><input type="checkbox"/> Menses</p> </td> </tr> </table> | <p>b. How often have you done breast self-exam in the past year?</p> <p><input type="checkbox"/> Monthly</p> <p><input type="checkbox"/> Several times</p> <p><input type="checkbox"/> Once</p> <p><input type="checkbox"/> None</p> <p><input type="checkbox"/> I have NEVER done it</p> | <p>c. What time of the month do you perform self-breast exam?</p> <p><input type="checkbox"/> At any time</p> <p><input type="checkbox"/> First week after menses</p> <p><input type="checkbox"/> Second week after menses</p> <p><input type="checkbox"/> Menses</p> |                                                          |                                                       |                                                    |                               |                                                 |                                           |
| <p>b. How often have you done breast self-exam in the past year?</p> <p><input type="checkbox"/> Monthly</p> <p><input type="checkbox"/> Several times</p> <p><input type="checkbox"/> Once</p> <p><input type="checkbox"/> None</p> <p><input type="checkbox"/> I have NEVER done it</p> | <p>c. What time of the month do you perform self-breast exam?</p> <p><input type="checkbox"/> At any time</p> <p><input type="checkbox"/> First week after menses</p> <p><input type="checkbox"/> Second week after menses</p> <p><input type="checkbox"/> Menses</p>                                                                                                                                                                                                                                                                                                                                                                                                                  |                                                                                                                                                                                                                                                                                           |                                                                                                                                                                                                                                                                       |                                                          |                                                       |                                                    |                               |                                                 |                                           |

| Section 5: LANGUAGE BARRIERS IN FORMAL HEALTHCARE                                          |                                                                                                                                                                                                                                                                                                                                                                                                                                                                                                                                                                                                                                        |                                                                                  |                                                                               |                                                                                            |                                                                               |                                                                  |                                                                               |
|--------------------------------------------------------------------------------------------|----------------------------------------------------------------------------------------------------------------------------------------------------------------------------------------------------------------------------------------------------------------------------------------------------------------------------------------------------------------------------------------------------------------------------------------------------------------------------------------------------------------------------------------------------------------------------------------------------------------------------------------|----------------------------------------------------------------------------------|-------------------------------------------------------------------------------|--------------------------------------------------------------------------------------------|-------------------------------------------------------------------------------|------------------------------------------------------------------|-------------------------------------------------------------------------------|
| 5.1a-c                                                                                     | <p>a. What is your region of origin? <input type="checkbox"/> Other region in Cameroon <input type="checkbox"/> Other country</p> <p><input type="checkbox"/> Southwest, Cameroon <b>b. Specify:</b> _____ <b>c. Specify country:</b> _____</p>                                                                                                                                                                                                                                                                                                                                                                                        |                                                                                  |                                                                               |                                                                                            |                                                                               |                                                                  |                                                                               |
| 5.2a-b                                                                                     | <p>a. Which language <u>is</u> spoken by the household <u>most often</u> at home?</p> <p><input type="checkbox"/> Pidgin English <input type="checkbox"/> English <input type="checkbox"/> French <input type="checkbox"/> Local language or other: b. _____</p>                                                                                                                                                                                                                                                                                                                                                                       |                                                                                  |                                                                               |                                                                                            |                                                                               |                                                                  |                                                                               |
| 5.3a-b                                                                                     | <p>a. Which <u>other languages</u> are spoken by household members? (select all that apply)</p> <p><input type="checkbox"/> Pidgin English <input type="checkbox"/> English <input type="checkbox"/> French <input type="checkbox"/> Local language or other: b. _____</p>                                                                                                                                                                                                                                                                                                                                                             |                                                                                  |                                                                               |                                                                                            |                                                                               |                                                                  |                                                                               |
| 5.4                                                                                        | <p>If you felt a doctor did not understand you, what would you <u>most likely</u> do?</p> <table border="0"> <tr> <td><input type="checkbox"/> Find another patient or family member to help translate</td> <td><input type="checkbox"/> Leave and go to a traditional healer</td> </tr> <tr> <td><input type="checkbox"/> Follow instructions to my best ability using what I do understand</td> <td><input type="checkbox"/> Leave and treat the problem at home</td> </tr> <tr> <td><input type="checkbox"/> Find a different doctor</td> <td><input type="checkbox"/> Other: b. _____</td> </tr> </table>                          | <input type="checkbox"/> Find another patient or family member to help translate | <input type="checkbox"/> Leave and go to a traditional healer                 | <input type="checkbox"/> Follow instructions to my best ability using what I do understand | <input type="checkbox"/> Leave and treat the problem at home                  | <input type="checkbox"/> Find a different doctor                 | <input type="checkbox"/> Other: b. _____                                      |
| <input type="checkbox"/> Find another patient or family member to help translate           | <input type="checkbox"/> Leave and go to a traditional healer                                                                                                                                                                                                                                                                                                                                                                                                                                                                                                                                                                          |                                                                                  |                                                                               |                                                                                            |                                                                               |                                                                  |                                                                               |
| <input type="checkbox"/> Follow instructions to my best ability using what I do understand | <input type="checkbox"/> Leave and treat the problem at home                                                                                                                                                                                                                                                                                                                                                                                                                                                                                                                                                                           |                                                                                  |                                                                               |                                                                                            |                                                                               |                                                                  |                                                                               |
| <input type="checkbox"/> Find a different doctor                                           | <input type="checkbox"/> Other: b. _____                                                                                                                                                                                                                                                                                                                                                                                                                                                                                                                                                                                               |                                                                                  |                                                                               |                                                                                            |                                                                               |                                                                  |                                                                               |
| 5.5                                                                                        | <p>Has <u>anyone</u> in the household ever gone to a hospital/medical center for any reason?</p> <p><input type="checkbox"/> Yes <input type="checkbox"/> No <input type="checkbox"/> Unknown</p>                                                                                                                                                                                                                                                                                                                                                                                                                                      |                                                                                  |                                                                               |                                                                                            |                                                                               |                                                                  |                                                                               |
| <i>If "Yes" ask questions 5.5 – 5.9. If "No" or "Unknown" end survey</i>                   |                                                                                                                                                                                                                                                                                                                                                                                                                                                                                                                                                                                                                                        |                                                                                  |                                                                               |                                                                                            |                                                                               |                                                                  |                                                                               |
| 5.6a-b                                                                                     | <p>a. If yes, what languages were spoken with staff? (select all that apply)</p> <p><input type="checkbox"/> Pidgin English <input type="checkbox"/> English <input type="checkbox"/> French <input type="checkbox"/> Local language or other: b. _____</p>                                                                                                                                                                                                                                                                                                                                                                            |                                                                                  |                                                                               |                                                                                            |                                                                               |                                                                  |                                                                               |
| 5.7a-c                                                                                     | <p>How much did the household member(s) understand: (For each letter circle <u>best</u> answer)</p> <table border="0"> <tr> <td>a. what the doctor told them about the problem?</td> <td>All of it / Most of it / Some of it / Very little / None of it / Unknown / NA</td> </tr> <tr> <td>b. instructions for how to take medicines correctly?</td> <td>All of it / Most of it / Some of it / Very little / None of it / Unknown / NA</td> </tr> <tr> <td>c. instructions for caring for the problem after returning home?</td> <td>All of it / Most of it / Some of it / Very little / None of it / Unknown / NA</td> </tr> </table> | a. what the doctor told them about the problem?                                  | All of it / Most of it / Some of it / Very little / None of it / Unknown / NA | b. instructions for how to take medicines correctly?                                       | All of it / Most of it / Some of it / Very little / None of it / Unknown / NA | c. instructions for caring for the problem after returning home? | All of it / Most of it / Some of it / Very little / None of it / Unknown / NA |
| a. what the doctor told them about the problem?                                            | All of it / Most of it / Some of it / Very little / None of it / Unknown / NA                                                                                                                                                                                                                                                                                                                                                                                                                                                                                                                                                          |                                                                                  |                                                                               |                                                                                            |                                                                               |                                                                  |                                                                               |
| b. instructions for how to take medicines correctly?                                       | All of it / Most of it / Some of it / Very little / None of it / Unknown / NA                                                                                                                                                                                                                                                                                                                                                                                                                                                                                                                                                          |                                                                                  |                                                                               |                                                                                            |                                                                               |                                                                  |                                                                               |
| c. instructions for caring for the problem after returning home?                           | All of it / Most of it / Some of it / Very little / None of it / Unknown / NA                                                                                                                                                                                                                                                                                                                                                                                                                                                                                                                                                          |                                                                                  |                                                                               |                                                                                            |                                                                               |                                                                  |                                                                               |
| 5.8                                                                                        | <p>Did the hospital staff understand what the household member(s) said to them? (circle best answer)</p> <p>All of it / Most of it / Some of it / Very little / None of it / Unknown</p>                                                                                                                                                                                                                                                                                                                                                                                                                                               |                                                                                  |                                                                               |                                                                                            |                                                                               |                                                                  |                                                                               |
| 5.9                                                                                        | <p>Has <u>anyone</u> in the household brought another person to the hospital/medical center to help them translate?</p> <p><input type="checkbox"/> Yes <input type="checkbox"/> No <input type="checkbox"/> Unknown</p>                                                                                                                                                                                                                                                                                                                                                                                                               |                                                                                  |                                                                               |                                                                                            |                                                                               |                                                                  |                                                                               |



**eTable 1. Household Demographic Comparison Between Community-Based Survey (2017) and Demographic and Health Survey (2011) Data for Southwest Region of Cameroon**

|                                            |                       | <b>Community-Based Survey (2017)</b><br><i>n= 8065</i> | <b>Demographic and Health Survey (2011)<sup>a</sup></b> |
|--------------------------------------------|-----------------------|--------------------------------------------------------|---------------------------------------------------------|
|                                            |                       | <b>Mean ± Std. Err. or Percentage</b>                  | <b>Mean ± Std. Err. or Percentage</b>                   |
| <b>Age</b>                                 |                       | 23.9 ± 0.2                                             | 22.2 ± 0.3                                              |
| <b>Gender</b>                              |                       |                                                        |                                                         |
|                                            | <i>Male</i>           | 48%                                                    | 48%                                                     |
|                                            | <i>Female</i>         | 52%                                                    | 52%                                                     |
| <b>Household owns cellphone</b>            |                       | 95%                                                    | 77%                                                     |
| <b>Household members</b>                   |                       | 6.3 ± 0.2                                              | 6.0 ± 0.1                                               |
| <b>Household owns agricultural land</b>    |                       | 65%                                                    | 66%                                                     |
| <b>Household home ownership</b>            |                       |                                                        |                                                         |
|                                            | <i>Owens the home</i> | 63%                                                    | 57%                                                     |
|                                            | <i>Rents the home</i> | 25%                                                    | 32%                                                     |
|                                            | <i>Lives for free</i> | 11%                                                    | 11%                                                     |
| <b>Urban<sup>b</sup></b>                   |                       | 58%                                                    | 44%                                                     |
| <b>Petroleum gas fuel used<sup>c</sup></b> |                       | 43%                                                    | 18%                                                     |
| <b>Wood fuel used<sup>c</sup></b>          |                       | 92%                                                    | 81%                                                     |

<sup>a</sup> Data from 2011 Cameroon Demographic and Health Survey (DHS)(11)

<sup>b</sup> Cameroonian Community Based Survey defined urban as multiple tarred road access whereas DHS data reports population size over 10,000.

<sup>c</sup> Cameroonian Community Based Survey asked about all cooking types used in the home whereas DHS data reports the most prevalent cooking type used by the household.

**eTable 2. Factors Associated With Care-Seeking Decisions and Severe Financial Hardship After Injury**

|                                    | <b>Adjusted Odds Ratio</b> | <b>95% CI</b> |
|------------------------------------|----------------------------|---------------|
| <b>Delayed or Non-Presentation</b> |                            |               |
| Age                                | 0.99                       | 0.98 -1.00    |
| Injury severity                    | 0.37                       | 0.21 -0.67    |
| Blunt trauma mechanism             | 2.42                       | 1.33 - 4.41   |
| Fall                               | 2.42                       | 1.52 -3.84    |
| Absence of first responder         | 1.92                       | 1.18 - 3.13   |
| <b>Formal Care Use</b>             |                            |               |
| Age                                |                            |               |
| Injury severity at scene           |                            |               |
| Road traffic injury                | 2.17                       | 1.24 - 3.78   |
| Bystander first responder          | 2.65                       | 1.25 - 5.60   |
| Injury sustained to torso          | 4.61                       | 1.53 - 13.95  |
| Injury sustained to head & neck    | 2.41                       | 1.33 - 4.39   |
| <b>Severe Financial Hardship</b>   |                            |               |
| Road traffic injury                | 2.13                       | 1.29 -3.53    |
| Formal care use                    | 1.67                       | 1.05 -2.65    |
| Disability days                    | 1.02                       | 1.01 -1.02    |
| Age, per 20 years                  | 1.35                       | 1.04 – 1.76   |
| Caretaker needed                   | 1.01                       | 0.99 – 1.03   |
| Urban household                    | 0.47                       | 0.29 -0.74    |
| Treatment cost, per US\$20         | 1.13                       | 1.05 -1.21    |

Legend: Multivariate logistic regression models were built using a stepwise regression analysis process.

**eTable 3. Demographics, Injury Characteristics and Use of Care in Interviewed Households**

| Interview | Age   | Gender | Region     | Mechanism     | Severity | Care Type(s)        |
|-----------|-------|--------|------------|---------------|----------|---------------------|
| 1         | Adult | F      | Urban      | RTI           | Moderate | Formal Care         |
| 2         | Adult | F      | Urban      | RTI           | Severe   | Formal Care         |
| 3         | Adult | M      | Semi-Rural | Burn          | Minor    | Informal Care       |
| 4         | Child | M      | Urban      | RTI           | Moderate | Formal Care         |
| 5         | Child | M      | Urban      | RTI           | Moderate | Multiple Care       |
| 6         | Child | F      | Semi-Rural | RTI           | Moderate | Multiple Care       |
| 7         | Adult | M      | Rural      | RTI           | Minor    | Multiple Care       |
| 8         | Adult | F      | Rural      | Fall          | Severe   | Multiple Care       |
| 9         | Adult | M      | Rural      | Blade/Knife   | Moderate | Multiple Care       |
| 10        | Adult | M      | Urban      | Blunt (other) | Severe   | Multiple Care       |
| 11        | Child | M      | Semi-Rural | Fall          | Severe   | Informal Care       |
| 12        | Adult | F      | Urban      | Burn          | Moderate | Informal Care       |
| 13        | Adult | F      | Urban      | Fall          | Severe   | Informal Care       |
| 14        | Child | F      | Urban      | RTI           | Severe   | Multiple Care       |
| 15        | Adult | F      | Urban      | RTI           | Severe   | Multiple Care       |
| 16        | Child | F      | Semi-Rural | RTI           | Severe   | Death Prior to Care |
| 17        | Adult | F      | Rural      | RTI           | Severe   | Informal Care       |
| 18        | Adult | F      | Rural      | Burn          | Severe   | Formal Care         |
| 19        | Adult | M      | Urban      | RTI           | Severe   | Multiple Care       |
| 20        | Adult | M      | Urban      | RTI           | Moderate | Informal Care       |
| 21        | Adult | F      | Urban      | RTI/Fall      | Moderate | Multiple Care       |
| 22        | Child | M      | Rural      | Burn          | Moderate | Multiple Care       |
| 23        | Child | M      | Rural      | Sharp         | Moderate | Formal Care         |
| 24        | Adult | F      | Rural      | Fall          | Severe   | Informal Care       |
| 25        | Child | F      | Rural      | Fall          | Moderate | Informal Care       |
| 26        | Adult | F      | Rural      | Fall          | Severe   | Death Prior to Care |

|           |       |   |            |             |          |               |
|-----------|-------|---|------------|-------------|----------|---------------|
| <b>27</b> | Adult | M | Semi-Rural | Blunt       | Severe   | Multiple Care |
| <b>28</b> | Adult | M | Rural      | Fall        | Moderate | Formal Care   |
| <b>29</b> | Adult | M | Rural      | Assault     | Severe   | Multiple Care |
| <b>30</b> | Adult | M | Rural      | RTI         | Severe   | Formal Care   |
| <b>31</b> | Adult | M | Semi-Rural | RTI         | Severe   | Formal Care   |
| <b>32</b> | Child | M | Urban      | Blade/Knife | Moderate | Informal Care |
| <b>33</b> | Adult | M | Urban      | Assault     | Severe   | Formal Care   |
| <b>34</b> | Adult | F | Urban      | RTI         | Moderate | Formal Care   |
|           |       |   |            |             |          |               |

Legend: Adult, >18 years old; Child, <18 years old; F, Female; M, Male; RTI, Road Traffic Injury; Minor, injury likely to lead to minimal to no disability regardless of care type sought; Moderate, untreated injury likely to lead to significant permanent disability or complications; Severe, life or limb threatening injury. Age and gender are reported for injured subject; respondent may be of a different age/gender. Severity designations assigned by authors on the basis of injury descriptions provided in interviews.

**eFigure. Distribution of Disability Type and Severity After Injury in Southwest Region of Cameroon (n= 503)**

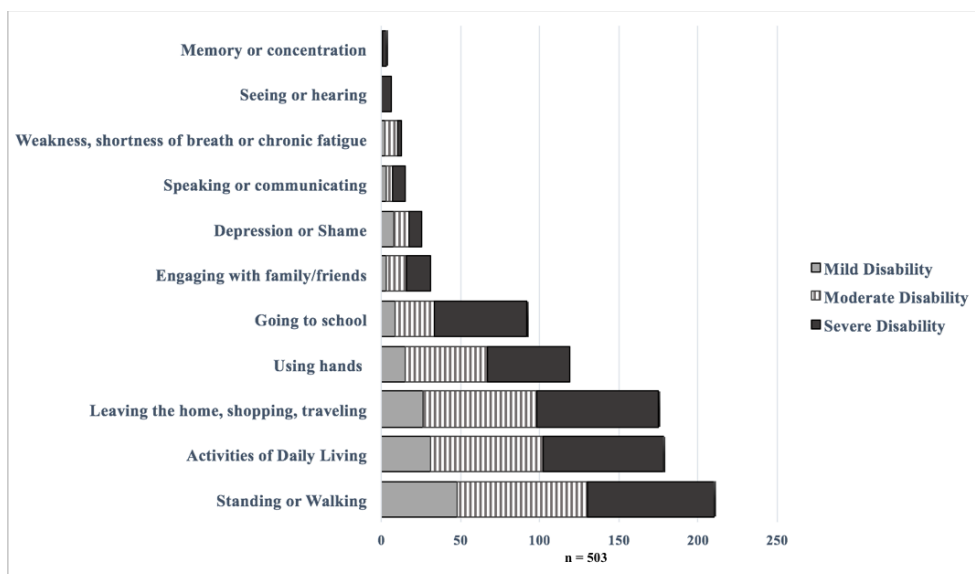

Supplement: jamanetwopen-3-e205171-s001.pdf [file jamanetwopen-3-e205171-s001.pdf]
